# Supplementary material for: Correlations between long inverted repeat (LIR) features, deletion size and distance from breakpoint in human gross gene deletions
Source: PubMed Central journal article supplement (PMC4319165; doi:10.1038/srep08300), 2015-02-06
Supplement: srep08300-s1.pdf [file srep08300-s1.pdf]

Supplementary information

**Correlations between long inverted repeat (LIR) features, deletion size and distance from breakpoint in human gross gene deletions**

Nevim Aygun<sup>1,\*</sup>

<sup>1</sup> Department of Medical Biology, Faculty of Medicine, Dokuz Eylul University, Inciralti, Izmir, Turkey.

\*Corresponding author: [nevim.aygun@gmail.com](mailto:nevim.aygun@gmail.com)

## Supplementary Tables

---

|                                                                                                                                          | <b>Page No:</b> |
|------------------------------------------------------------------------------------------------------------------------------------------|-----------------|
| Table S1   Gross gene deletions associated with cancers and genetic diseases,<br>obtained from Human Gene Mutation Database (HGMD) ..... | 3-4             |
| Table S2   Deletion sizes and total LIR numbers for deletion and control groups .....                                                    | 5-13            |
| Table S3   Properties of LIRs selected from genomic regions including 5' and 3'<br>breakpoint locations .....                            | 14-15           |
| Table S4   Properties of new LIRs identified between distant genomic regions<br>including 5' and 3' breakpoint sequences .....           | 16              |

## Supplementary Figures

---

|                                                                                                                            | <b>Page No:</b> |
|----------------------------------------------------------------------------------------------------------------------------|-----------------|
| Figure S1   Distribution of 138 LIRs in the 5' and 3' breakpoint regions from<br>109 gross gene deletions .....            | 17              |
| Figure S2   Stem lengths of 138 LIRs identified in 5'and/or 3' breakpoints from<br>89 gross deletions .....                | 18              |
| Figure S3   Stem identities of 138 LIRs identified in 5'and/or 3' breakpoints from<br>89 gross deletions .....             | 19              |
| Figure S4   Distance from breakpoint of the 138 LIRs located at the 5' and 3'<br>breakpoints of gross gene deletions ..... | 20              |
| Figure S5   Internal spacer of the 138 LIRs located at the 5' and 3' breakpoints of<br>gross gene deletions .....          | 21              |
| Figure S6   Properties of LIRs that included at both 5' and 3' breakpoint sequences<br>from 49 genomic regions .....       | 22              |

Table S1 | Gross gene deletions associated with cancers and genetic diseases, obtained from Human Gene Mutation Database (HGMD)

| GENE                 | PHENOTYPE                      | REFERENCES <sup>a</sup>            | GENE             | PHENOTYPE                     | REFERENCES <sup>a</sup>              |
|----------------------|--------------------------------|------------------------------------|------------------|-------------------------------|--------------------------------------|
| 1- <i>BRCA1</i>      | Breast cancer                  | GRaBD                              | 32- <i>PTEN</i>  | Cowden disease                | Chibon et al. <sup>b,43</sup>        |
| 2- <i>BRCA1</i>      | Breast cancer                  | GRaBD                              | 33- <i>PTEN</i>  | Cowden disease                | Chibon et al. <sup>b,43</sup>        |
| 3- <i>BRCA1</i>      | Breast, ovarian cancer         | Montagna et al. <sup>33</sup>      | 34- <i>PTEN</i>  | Cowden disease                | Chibon et al. <sup>b,43</sup>        |
| 4- <i>BRCA1</i>      | Breast, ovarian cancer         | Tancredi et al. <sup>34</sup>      | 35- <i>MEN1</i>  | Multiple endocrin neoplasia 1 | Kikuchi et al. <sup>44</sup>         |
| 5- <i>BRCA1</i>      | Breast, ovarian cancer         | Agata et al. <sup>35</sup>         | 36- <i>BTK</i>   | Agammaglobulinemia            | Jo et al. <sup>45</sup>              |
| 6- <i>BRCA1</i>      | Breast, ovarian cancer         | Montagna et al. <sup>33</sup>      | 37- <i>HBB</i>   | Thalassemia, delta-beta       | Palena et al. <sup>46</sup>          |
| 7- <i>BRCA2</i>      | Breast cancer                  | GRaBD                              | 38- <i>ATM</i>   | Ataxia telangiectasia         | Mitui et al. <sup>47</sup>           |
| 8- <i>BRCA2</i>      | Breast cancer                  | Agata et al. <sup>36</sup>         | 39- <i>MSH2</i>  | Lynch syndrome                | Li et al. <sup>48</sup>              |
| 9- <i>BRCA2</i>      | Breast cancer, male            | Tournier et al. <sup>37</sup>      | 40- <i>MSH2</i>  | Lynch syndrome                | Li et al. <sup>48</sup>              |
| 10- <i>BRCA2</i>     | Breast cancer                  | Agata et al. <sup>36</sup>         | 41- <i>MSH2</i>  | Lynch syndrome                | Li et al. <sup>48</sup>              |
| 11- <i>BRCA2</i>     | Breast cancer                  | Agata et al. <sup>36</sup>         | 42- <i>MSH2</i>  | Lynch syndrome                | Li et al. <sup>48</sup>              |
| 12- <i>CDKN2A/2B</i> | T-cell ALL                     | GRaBD                              | 43- <i>MLH1</i>  | Lynch syndrome                | Li et al. <sup>48</sup>              |
| 13- <i>NF1</i>       | Neurofibromatosis 1            | Vandenbroucke et al. <sup>38</sup> | 44- <i>MLH1</i>  | Lynch syndrome                | Li et al. <sup>48</sup>              |
| 14- <i>NF1</i>       | Neurofibromatosis 1            | GRaBD                              | 45- <i>MLH1</i>  | Lynch syndrome                | Li et al. <sup>48</sup>              |
| 15- <i>RBI</i>       | Retinoblastoma                 | GRaBD                              | 46- <i>MLH1</i>  | Lynch syndrome                | Li et al. <sup>48</sup>              |
| 16- <i>RBI</i>       | Breast cancer                  | GRaBD                              | 47- <i>MSH6</i>  | Lynch syndrome                | van der Klift et al. <sup>49</sup>   |
| 17- <i>RBI</i>       | Retinoblastoma                 | GRaBD                              | 48- <i>MSH6</i>  | Lynch syndrome                | van der Klift et al. <sup>49</sup>   |
| 18- <i>RBI</i>       | Osteosarcoma                   | GRaBD                              | 49- <i>PMS2</i>  | Lynch syndrome                | van der Klift et al. <sup>49</sup>   |
| 19- <i>RBI</i>       | Retinoblastoma                 | GRaBD                              | 50- <i>HEXA</i>  | Tay-Sachs disease             | Myerowitz et al. <sup>b,50</sup>     |
| 20- <i>RBI</i>       | Retinoblastoma                 | GRaBD                              | 51- <i>HPRT1</i> | Fanconi anemia                | GRaBD                                |
| 21- <i>APC</i>       | Familial adenomatous polyposis | Takahashi et al. <sup>b,39</sup>   | 52- <i>HPRT1</i> | Fanconi anemia                | GRaBD                                |
| 22- <i>APC</i>       | Familial adenomatous polyposis | Takahashi et al. <sup>b,39</sup>   | 53- <i>LDLR</i>  | Hypercholesterolemia          | GRaBD                                |
| 23- <i>TSC2</i>      | Tuberous sclerosis             | Longa et al. <sup>40</sup>         | 54- <i>PAX6</i>  | Aniridia                      | Lauderdale et al. <sup>51</sup>      |
| 24- <i>TSC2</i>      | Tuberous sclerosis             | Longa et al. <sup>40</sup>         | 55- <i>PAX6</i>  | Aniridia                      | Lauderdale et al. <sup>51</sup>      |
| 25- <i>TSC2</i>      | Tuberous sclerosis             | Longa et al. <sup>40</sup>         | 56- <i>IGHM</i>  | Hypogammaglobulinemia         | van Zelm et al. <sup>b,52</sup>      |
| 26- <i>TSC1</i>      | Tuberous sclerosis             | Longa et al. <sup>40</sup>         | 57- <i>PKLR</i>  | Haemolytic anaemia            | Baronciani and Beutler <sup>53</sup> |
| 27- <i>ADA</i>       | Adenosine deaminase deficiency | GRaBD                              | 58- <i>LHCGR</i> | Leydig cell hypoplasia        | Gromoll et al. <sup>54</sup>         |
| 28- <i>WT1</i>       | Wilms tumour                   | Tadokoro et al. <sup>41</sup>      | 59- <i>F 8</i>   | Haemophilia A                 | GRaBD                                |
| 29- <i>DMD</i>       | Muscular dystrophy, Duchenne.  | Gualandi et al. <sup>42</sup>      | 60- <i>F 8</i>   | Haemophilia A                 | Shibata et al. <sup>55</sup>         |
| 30- <i>DMD</i>       | Muscular dystrophy, Duchenne   | Gualandi et al. <sup>42</sup>      | 61- <i>STS</i>   | Ichthyosis                    | GRaBD                                |
| 31- <i>PTEN</i>      | Cowden disease                 | Chibon et al. <sup>b,43</sup>      | 62- <i>WAS</i>   | Wiskott-Aldrich syndrome      | Imai et al. <sup>56</sup>            |

Table S1 Continued

| GENE                | PHENOTYPE                           | REFERENCES                      | GENE               | PHENOTYPE                             | REFERENCES                     |
|---------------------|-------------------------------------|---------------------------------|--------------------|---------------------------------------|--------------------------------|
| 63- <i>VWF</i>      | Von Willebrand disease 3            | Xie et al. <sup>23</sup>        | 87- <i>CFTR</i>    | Cystic fibrosis                       | Audrézet et al. <sup>74</sup>  |
| 64- <i>VWF</i>      | Von Willebrand disease 3            | Peake et al. <sup>57</sup>      | 88- <i>CFTR</i>    | Cystic fibrosis                       | Dörk et al. <sup>75</sup>      |
| 65- <i>VPS13B</i>   | Cohen syndrome                      | Seifert et al. <sup>58</sup>    | 89- <i>CHRNE</i>   | Congenital myasthenic syndrome        | Abicht et al. <sup>76</sup>    |
| 66- <i>SMN1</i>     | Spinal muscular atrophy             | Wirth et al. <sup>b,59</sup>    | 90- <i>COL17A1</i> | Epidermolysis bullosa                 | Huber et al. <sup>77</sup>     |
| 67- <i>SLC3A1</i>   | Hypotonia-Cystinuria syndrome       | Jaeken et al. <sup>60</sup>     | 91- <i>CYBB</i>    | Chronic granulomatous disease         | GRaBD                          |
| 68- <i>SERPING1</i> | Angioneurotic oedema                | Roche et al. <sup>61</sup>      | 92- <i>FANCA</i>   | Fanconi anemia                        | Morgan et al. <sup>78</sup>    |
| 69- <i>SDHC</i>     | Paraganglioma                       | Baysal et al. <sup>62</sup>     | 93- <i>FANCA</i>   | Fanconi anemia                        | Tipping et al. <sup>79</sup>   |
| 70- <i>SALL4</i>    | Okhiro syndrome                     | Borozdin et al. <sup>63</sup>   | 94- <i>FBN1</i>    | Marfan syndrome                       | Liu et al. <sup>80</sup>       |
| 71- <i>PROS1</i>    | Protein S deficiency                | Schmidel et al. <sup>64</sup>   | 95- <i>FBN1</i>    | Marfan syndrome                       | Liu et al. <sup>80</sup>       |
| 72- <i>PREPL</i>    | Hypotonia-Cystinuria syndrome       | Jaeken et al. <sup>60</sup>     | 96- <i>FERMT1</i>  | Kindler Syndrome                      | Has et al. <sup>81</sup>       |
| 73- <i>PREPL</i>    | Hypotonia-Cystinuria syndrome       | Jaeken et al. <sup>60</sup>     | 97- <i>FGA</i>     | Afibrinogenaemia                      | Spena et al. <sup>82</sup>     |
| 74- <i>PKHD1</i>    | Polycystic kidney disease           | Bergmann et al. <sup>65</sup>   | 98- <i>FOXL2</i>   | Blepharophimosis syndrome             | Beysen et al. <sup>83</sup>    |
| 75- <i>PKHD1</i>    | Polycystic kidney disease           | Bergmann et al. <sup>65</sup>   | 99- <i>GAA</i>     | Glycogen storage disease 2            | Huie et al. <sup>84</sup>      |
| 76- <i>PKD1</i>     | Polycystic kidney disease 1         | Thomas et al. <sup>66</sup>     | 100- <i>GBE1</i>   | Glycogen storage disease 4            | Tay et al. <sup>85</sup>       |
| 77- <i>PINK1</i>    | Parkinson disease                   | Li et al. <sup>67</sup>         | 101- <i>GHR</i>    | Laron dwarfism                        | Besson et al. <sup>86</sup>    |
| 78- <i>PARK2</i>    | Parkinsonism                        | Clarimon et al. <sup>68</sup>   | 102- <i>GLA</i>    | Fabry disease                         | Kornreich et al. <sup>87</sup> |
| 79- <i>OCA2</i>     | Albinism                            | Yi et al. <sup>69</sup>         | 103- <i>GLA</i>    | Fabry disease                         | Kornreich et al. <sup>87</sup> |
| 80- <i>NSD1</i>     | Sotos syndrome                      | Douglas et al. <sup>70</sup>    | 104- <i>GLI3</i>   | Greig cephalopolysyndactyly syndrome. | Johnston et al. <sup>88</sup>  |
| 81- <i>NSD1</i>     | Sotos syndrome                      | Douglas et al. <sup>70</sup>    | 105- <i>GLI3</i>   | Greig cephalopolysyndactyly syndrome  | Johnston et al. <sup>88</sup>  |
| 82- <i>MLC1</i>     | Megalencephalic leukoencephalopathy | Leegwater et al. <sup>71</sup>  | 106- <i>GLI3</i>   | Greig cephalopolysyndactyly syndrome  | Johnston et al. <sup>88</sup>  |
| 83- <i>ATP7A</i>    | Menkes syndrome                     | Poulsen et al. <sup>72</sup>    | 107- <i>GLI3</i>   | Greig cephalopolysyndactyly syndrome  | Johnston et al. <sup>88</sup>  |
| 84- <i>ATP7A</i>    | Menkes syndrome                     | Poulsen et al. <sup>72</sup>    | 108- <i>GLI3</i>   | Greig cephalopolysyndactyly syndrome  | Johnston et al. <sup>88</sup>  |
| 85- <i>ATP7A</i>    | Menkes syndrome                     | Poulsen et al. <sup>72</sup>    | 109- <i>HBA1</i>   | Thalassaemia alpha                    | Jia et al. <sup>89</sup>       |
| 86- <i>AVPR2</i>    | Diabetes insipidus, nephrogenic     | Schöneberg et al. <sup>73</sup> |                    |                                       |                                |

<sup>a</sup> Breakpoint sequences of gross gene deletions were surveyed in references listed in HGMD, although some sequences were obtained from GRaBD.

<sup>b</sup> In addition to HGMD and GRaBD, five references regarding gross gene deletions were from the literature. Abbreviations: GRaBD, gross rearrangement breakpoint database; HGMD, human gene mutation database.

Table S2 | Deletion sizes and total LIR numbers for deletion and control groups\*

| CONTROL GENE | GENE SIZE (Kb) | SELECTED REGION (Bp) | LIR Nr | DELETION GENE/ BREAK/ | DEL SIZE (Bp) | LIR Nr |
|--------------|----------------|----------------------|--------|-----------------------|---------------|--------|
| 1-ADAMTS10   | 30.46          | 1-20,000             | 2      | 1-BRCA1/5'            | 14,015        | 53     |
| 2-ACSL4      | 92.06          | 1-20,000             | 20     | 2-BRCA1/5'            | 3,836         | 23     |
| 3-ACSL4      | 92.06          | 30,000-50,000        | 9      | 3-BRCA1/5'            | 36,380        | 45     |
| 4-ACSL4      | 92.06          | 60,000-80,000        | 5      | 4-BRCA1/5'            | 19,886        | 32     |
| 5-ADRA1A     | 117.26         | 1-20,000             | 0      | 5-BRCA1/5'            | 18,341        | 37     |
| 6-ADRA1A     | 117.26         | 30,000-50,000        | 1      | 6-BRCA1/5'            | 4,825         | 46     |
| 7-ADRA1A     | 117.26         | 60,000-80,000        | 2      | 7-BRCA2/5'            | 5,066         | 10     |
| 8-ADRA1A     | 117.26         | 90,000-110,000       | 0      | 8-BRCA2/5'            | 14,321        | 11     |
| 9-BDKRB2     | 39.53          | 1-20,000             | 2      | 9-BRCA2/5'            | 7,947         | 3      |
| 10-BHMT      | 20.51          | 1-20,000             | 8      | 10-BRCA2/5'           | 10,837        | 18     |
| 11-BLNK      | 79.88          | 1-20,000             | 3      | 11-BRCA2/5'           | 4,952         | 20     |
| 12-BLNK      | 79.88          | 30,000-50,000        | 5      | 12-CDKN2A/2B /5'      | 33,844        | 0      |
| 13-BTC       | 48.44          | 1-20,000             | 2      | 13-NF1/5'             | 99,609        | 2      |
| 14-C8A       | 63.45          | 1-20,000             | 1      | 14-NF1/5'             | 12,006        | 5      |
| 15-C8A       | 63.45          | 30,000-50,000        | 11     | 15-RB1/5'             | 52,348        | 2      |
| 16-CRYM      | 44.58          | 1-20,000             | 10     | 16-RB1/5'             | 177,964       | 1      |
| 17-DIAPH1    | 104.04         | 1-20,000             | 10     | 17-RB1/5'             | 201,857       | 1      |
| 18-DIAPH1    | 104.04         | 30,000-50,000        | 2      | 18-RB1/5'             | 40,043        | 0      |
| 19-DIAPH1    | 104.04         | 60,000-80,000        | 12     | 19-RB1/5'             | 3,905         | 1      |
| 20-DKK3      | 46.38          | 1-20,000             | 4      | 20-RB1/5'             | 2,394         | 3      |
| 21-DMGDH     | 72.02          | 1-20,000             | 7      | 21-APC/5'             | 435,465       | 0      |
| 22-DMGDH     | 72.02          | 30,000-50,000        | 2      | 22-APC/5'             | 737,499       | 3      |
| 23-DRD3      | 50.34          | 1-20,000             | 8      | 23-TSC2/5'            | 8,428         | 12     |
| 24-DRD3      | 50.34          | 30,000-50,000        | 9      | 24-TSC2/5'            | 10,115        | 13     |
| 25-ECE1      | 128.30         | 1-20,000             | 6      | 25-TSC2/5'            | 916           | 13     |

|            |        |                 |    |             |         |    |
|------------|--------|-----------------|----|-------------|---------|----|
| 26-ECE1    | 128.30 | 30,000-50,000   | 9  | 26-TSC1/5'  | 7,636   | 9  |
| 27-ECE1    | 128.30 | 60,000-80,000   | 10 | 27-ADA/5'   | 3,257   | 12 |
| 28-ECE1    | 128.30 | 90,000-110,000  | 22 | 28-WT1/5'   | 7,319   | 5  |
| 29-ELF4    | 45.79  | 1-20,000        | 15 | 29-DMD/5'   | 7,787   | 4  |
| 30-EDARADD | 90.33  | 1-20,000        | 20 | 30-DMD/5'   | 3,847   | 4  |
| 31-EDARADD | 90.33  | 30,000-50,000   | 36 | 31-PTEN/5'  | 452,962 | 5  |
| 32-EDARADD | 90.33  | 60,000-80,000   | 19 | 32-PTEN/5'  | 662,072 | 7  |
| 33-EXO1    | 41.51  | 1-20,000        | 6  | 33-PTEN/5'  | 13,603  | 5  |
| 34-FCRL3   | 22.67  | 1-20,000        | 2  | 34-PTEN/5'  | 300,312 | 4  |
| 35-FREM2   | 200.10 | 1-20,000        | 0  | 35-MEN1/5'  | 67,726  | 4  |
| 36-FREM2   | 200.10 | 30,000-50,000   | 1  | 36-BTK/5'   | 5,892   | 13 |
| 37-FREM2   | 200.10 | 60,000-80,000   | 1  | 37-HBB/5'   | 9,067   | 1  |
| 38-FREM2   | 200.10 | 90,000-110,000  | 1  | 38-ATM/5'   | 3,449   | 11 |
| 39-FREM2   | 200.10 | 120,000-140,000 | 0  | 39-MSH2/5'  | 36,626  | 48 |
| 40-FREM2   | 200.10 | 150,000-170,000 | 3  | 40-MSH2/5'  | 2,178   | 29 |
| 41-FREM2   | 200.10 | 180,000-200,000 | 1  | 41-MSH2/5'  | 15,380  | 29 |
| 42-GAD1    | 44.46  | 1-20,000        | 9  | 42-MSH2/5'  | 6,664   | 40 |
| 43-FMO1    | 37.45  | 1-20,000        | 7  | 43-MLH1/5'  | 6,053   | 6  |
| 44-GARS    | 39.47  | 1-20,000        | 0  | 44-MLH1/5'  | 3,526   | 5  |
| 45-GDNF    | 24.03  | 1-20,000        | 0  | 45-MLH1/5'  | 14,331  | 5  |
| 46-GLTSCR1 | 95.08  | 1-20,000        | 20 | 46-MLH1/5'  | 12,680  | 7  |
| 47-GLTSCR1 | 95.08  | 30,000-50,000   | 32 | 47-MSH6/5'  | 11,311  | 29 |
| 48-GLTSCR1 | 95.08  | 60,000-80,000   | 8  | 48-MSH6/5'  | 21,673  | 25 |
| 49-GOLGA5  | 45.66  | 1-20,000        | 8  | 49-PMS2/5'  | 1,158   | 58 |
| 50-HCRTR2  | 108.35 | 1-20,000        | 2  | 50-HEXA/5'  | 7,946   | 15 |
| 51-HCRTR2  | 108.35 | 30,000-50,000   | 1  | 51-HPRT1/5' | 13,280  | 11 |
| 52-HCRTR2  | 108.35 | 60,000-80,000   | 6  | 52-HPRT1/5' | 159     | 11 |

|           |        |                 |    |                 |           |    |
|-----------|--------|-----------------|----|-----------------|-----------|----|
| 53-HK2    | 60.70  | 1-20,000        | 5  | 53-LDLR/5'/     | 7,072     | 75 |
| 54-HK2    | 60.70  | 30,000-50,000   | 0  | 54-PAX6/5'/     | 1,002,066 | 1  |
| 55-GRB10  | 203.40 | 1-20,000        | 1  | 55-PAX6/5'/     | 836,161   | 3  |
| 56-GRB10  | 203.40 | 30,000-50,000   | 0  | 56-IGHM/5'/     | 732,160   | 0  |
| 57-GRB10  | 203.40 | 60,000-80,000   | 1  | 57-PKLR/5'/     | 1,141     | 1  |
| 58-GRB10  | 203.40 | 90,000-110,000  | 0  | 58-LHCGR/5'/    | 6,085     | 1  |
| 59-GRB10  | 203.40 | 120,000-140,000 | 0  | 59-F 8/5'/      | 19,942    | 2  |
| 60-GRB10  | 203.40 | 150,000-170,000 | 0  | 60-F 8/5'/      | 29,175    | 4  |
| 61-GRB10  | 203.40 | 180,000-200,000 | 0  | 61-ST5/5'/      | 40,058    | 1  |
| 62-HIBCH  | 115.20 | 1-20,000        | 11 | 62-WAS/5'/      | 1,871     | 9  |
| 63-HIBCH  | 115.20 | 30,000-50,000   | 6  | 63-VWF/5'/      | 61,045    | 25 |
| 64-HIBCH  | 115.20 | 60,000-80,000   | 3  | 64-VWF/5'/      | 2,321     | 3  |
| 65-HIBCH  | 115.20 | 90,000-110,000  | 0  | 65-VPS13B/5'/   | 1,783     | 12 |
| 66-IKBPAP | 66.81  | 1-20,000        | 2  | 66-SMN1/5'/     | 6,693     | 43 |
| 67-IKBPAP | 66.81  | 30,000-50,000   | 0  | 67-SLC3A1/5'/   | 30,317    | 7  |
| 68-IMPA2  | 49.42  | 1-20,000        | 4  | 68-SERPING1/5'/ | 2,889     | 14 |
| 69-KIF1B  | 170.90 | 1-20,000        | 31 | 69-SDHC/5'/     | 8,370     | 24 |
| 70-KIF1B  | 170.90 | 30,000-50,000   | 37 | 70-SALL4/5'/    | 8,889     | 28 |
| 71-KIF1B  | 170.90 | 60,000-80,000   | 14 | 71-PROS1/5'/    | 4,434     | 5  |
| 72-KIF1B  | 170.90 | 90,000-110,000  | 17 | 72-PREPL/5'/    | 23,873    | 2  |
| 73-KIF1B  | 170.90 | 120,000-140,000 | 24 | 73-PREPL/5'/    | 38,121    | 10 |
| 74-KIF1B  | 170.90 | 150,000-170,000 | 29 | 74-PKHD1/5'/    | 7,319     | 0  |
| 75-LIG1   | 54.86  | 1-20,000        | 20 | 75-PKHD1/5'/    | 13,203    | 0  |
| 76-LIG1   | 54.86  | 30,000-50,000   | 11 | 76-PKD1/5'/     | 2,899     | 0  |
| 77-KRAS   | 45.68  | 1-20,000        | 3  | 77-PINK1/5'/    | 4,603     | 14 |
| 78-LDB3   | 67.62  | 1-20,000        | 3  | 78-PARK2/5'/    | 156,203   | 2  |
| 79-LDB3   | 67.62  | 30,000-50,000   | 6  | 79-OCA2 /5'/    | 122,571   | 3  |

|           |        |                 |    |                |           |    |
|-----------|--------|-----------------|----|----------------|-----------|----|
| 80-LRP8   | 82.61  | 1-20,000        | 0  | 80-NSD1/5'/    | 23,881    | 26 |
| 81-LRP8   | 82.61  | 30,000-50,000   | 0  | 81-NSD1/5'/    | 7,997     | 21 |
| 82-LRP8   | 82.61  | 60,000-80,000   | 1  | 82-MLC1/5'/    | 2,152     | 12 |
| 83-LITAF  | 39.75  | 1-20,000        | 34 | 83-ATP7A/5'/   | 15,210    | 8  |
| 84-LRCH1  | 190.43 | 1-20,000        | 0  | 84-ATP7A/5'/   | 13,734    | 11 |
| 85-LRCH1  | 190.43 | 30,000-50,000   | 5  | 85-ATP7A/5'/   | 13,738    | 14 |
| 86-LRCH1  | 190.43 | 60,000-80,000   | 2  | 86-AVPR2/5'/   | 21,514    | 14 |
| 87-LRCH1  | 190.43 | 90,000-110,000  | 13 | 87-CFTR/5'/    | 1,530     | 0  |
| 88-LRCH1  | 190.43 | 120,000-140,000 | 2  | 88-CFTR/5'/    | 21,081    | 1  |
| 89-LRCH1  | 190.43 | 150,000-170,000 | 0  | 89-CHRNE/5'/   | 1,289     | 36 |
| 90-MASTL  | 32.13  | 1-20,000        | 27 | 90-COL17A1/5'/ | 20,995    | 0  |
| 91-MFI2   | 26.53  | 1-20,000        | 3  | 91-CYBB/5'/    | 25,327    | 4  |
| 92-MCM3AP | 50.19  | 1-20,000        | 29 | 92-FANCA/5'/   | 2,059     | 36 |
| 93-MCM3AP | 50.19  | 30,000-50,000   | 12 | 93-FANCA/5'/   | 44,129    | 34 |
| 94-MYOT   | 20.0   | 1-20,000        | 13 | 94-FBN1/5'/    | 6,435     | 1  |
| 95-NLGN3  | 26.37  | 1-20,000        | 11 | 95-FBN1/5'/    | 7,134     | 5  |
| 96-NMU    | 41.07  | 1-20,000        | 2  | 96-FERMT1/5'/  | 3,918     | 12 |
| 97-OPRM1  | 236.37 | 1-20,000        | 1  | 97-FGA/5'/     | 15,229    | 1  |
| 98-OPRM1  | 236.37 | 30,000-50,000   | 3  | 98-FOXL2/5'/   | 8,226     | 2  |
| 99-OPRM1  | 236.37 | 60,000-80,000   | 6  | 99-GAA/5'/     | 8,287     | 2  |
| 100-OPRM1 | 236.37 | 90,000-110,000  | 1  | 100-GBE1/5'/   | 105,686   | 2  |
| 101-OPRM1 | 236.37 | 120,000-140,000 | 1  | 101-GHR/5'/    | 4,098     | 1  |
| 102-OPRM1 | 236.37 | 150,000-170,000 | 1  | 102-GLA/5'/    | 4,518     | 22 |
| 103-OPRM1 | 236.37 | 180,000-200,000 | 1  | 103-GLA/5'/    | 4,654     | 12 |
| 104-OPRM1 | 236.37 | 210,000-230,000 | 5  | 104-GLI3/5'/   | 176,334   | 13 |
| 105-OTOA  | 82.22  | 1-20,000        | 22 | 105-GLI3/5'/   | 150,856   | 0  |
| 106-OTOA  | 82.22  | 30,000-50,000   | 19 | 106-GLI3/5'/   | 1,006,671 | 0  |



|           |        |                 |    |                   |           |    |
|-----------|--------|-----------------|----|-------------------|-----------|----|
| 107-OTOA  | 82.22  | 60,000-80,000   | 10 | 107-GLI3/5'/      | 727,747   | 4  |
| 108-PALLD | 431.39 | 1-20,000        | 2  | 108-GLI3/5'/      | 5,952,284 | 0  |
| 109-PALLD | 431.39 | 30,000-50,000   | 7  | 109-HBA1/5'/      | 11,172    | 5  |
| 110-PALLD | 431.39 | 60,000-80,000   | 2  | 110-BRCA1/3'/     | 14,015    | 15 |
| 111-PALLD | 431.39 | 90,000-110,000  | 8  | 111-BRCA1/3'/     | 3,836     | 37 |
| 112-PALLD | 431.39 | 120,000-140,000 | 2  | 112-BRCA1/3'/     | 36,380    | 53 |
| 113-PALLD | 431.39 | 150,000-170,000 | 0  | 113-BRCA1/3'/     | 19,886    | 52 |
| 114-PALLD | 431.39 | 180,000-200,000 | 1  | 114-BRCA1/3'/     | 18,341    | 55 |
| 115-PALLD | 431.39 | 210,000-230,000 | 1  | 115-BRCA1/3'/     | 4,825     | 51 |
| 116-PALLD | 431.39 | 240,000-260,000 | 1  | 116-BRCA2/3'/     | 5,066     | 9  |
| 117-PALLD | 431.39 | 270,000-290,000 | 3  | 117-BRCA2/3'/     | 14,321    | 4  |
| 118-PALLD | 431.39 | 300,000-320,000 | 14 | 118-BRCA2/3'/     | 7,947     | 5  |
| 119-PALLD | 431.39 | 330,000-350,000 | 1  | 119-BRCA2/3'/     | 10,837    | 20 |
| 120-PALLD | 431.39 | 360,000-380,000 | 4  | 120-BRCA2/3'/     | 4,952     | 17 |
| 121-PALLD | 431.39 | 390,000-410,000 | 9  | 121-CDKN2A/2B/3'/ | 33,844    | 10 |
| 122-PDSS1 | 49.13  | 1-20,000        | 19 | 122-NF1/3'/       | 99,609    | 11 |
| 123-PSPH  | 40.53  | 1-20,000        | 78 | 123-NF1/3'/       | 12,006    | 4  |
| 124-RAF1  | 80.60  | 1-20,000        | 30 | 124-RB1/3'/       | 52,348    | 1  |
| 125-RAF1  | 80.60  | 30,000-50,000   | 38 | 125-RB1/3'/       | 177,964   | 4  |
| 126-RAF1  | 80.60  | 60,000-80,000   | 9  | 126-RB1/3'/       | 201,857   | 0  |
| 127-RIMS1 | 516.20 | 1-20,000        | 0  | 127-RB1/3'/       | 40,043    | 3  |
| 128-RIMS1 | 516.20 | 30,000-50,000   | 2  | 128-RB1/3'/       | 3,905     | 4  |
| 129-RIMS1 | 516.20 | 60,000-80,000   | 0  | 129-RB1/3'/       | 2,394     | 3  |
| 130-RIMS1 | 516.20 | 90,000-110,000  | 3  | 130-APC/3'/       | 435,465   | 23 |
| 131-RIMS1 | 516.20 | 120,000-140,000 | 0  | 131-APC/3'/       | 737,499   | 7  |
| 132-RIMS1 | 516.20 | 150,000-170,000 | 1  | 132-TSC2/3'/      | 8,428     | 15 |
| 133-RIMS1 | 516.20 | 180,000-200,000 | 1  | 133-TSC2/3'/      | 10,115    | 9  |

|            |        |                 |    |                            |         |    |
|------------|--------|-----------------|----|----------------------------|---------|----|
| 134-RIMS1  | 516.20 | 210,000-230,000 | 2  | 134-TSC2/3 <sup>2</sup> /  | 916     | 13 |
| 135-RIMS1  | 516.20 | 240,000-260,000 | 1  | 135-TSC1/3 <sup>2</sup> /  | 7,636   | 4  |
| 136-RIMS1  | 516.20 | 270,000-290,000 | 2  | 136-ADA/3 <sup>2</sup> /   | 3,257   | 12 |
| 137-RIMS1  | 516.20 | 300,000-320,000 | 0  | 137-WT1/3 <sup>2</sup> /   | 7,319   | 9  |
| 138-RIMS1  | 516.20 | 330,000-350,000 | 1  | 138-DMD/3 <sup>2</sup> /   | 7,787   | 4  |
| 139-RIMS1  | 516.20 | 360,000-380,000 | 1  | 139-DMD/3 <sup>2</sup> /   | 3,847   | 4  |
| 140-RIMS1  | 516.20 | 390,000-410,000 | 1  | 140-PTEN/3 <sup>2</sup> /  | 452,962 | 5  |
| 141-RIMS1  | 516.20 | 420,000-440,000 | 1  | 141-PTEN/3 <sup>2</sup> /  | 662,072 | 2  |
| 142-RIMS1  | 516.20 | 450,000-470,000 | 2  | 142-PTEN/3 <sup>2</sup> /  | 13,603  | 0  |
| 143-RIMS1  | 516.20 | 480,000-500,000 | 1  | 143-PTEN/3 <sup>2</sup> /  | 300,312 | 5  |
| 144-SNCAIP | 151.98 | 1-20,000        | 0  | 144-MEN1/3 <sup>2</sup> /  | 67,726  | 22 |
| 145-SNCAIP | 151.98 | 30,000-50,000   | 0  | 145-BTK/3 <sup>2</sup> /   | 5,892   | 10 |
| 146-SNCAIP | 151.98 | 60,000-80,000   | 0  | 146-HBB/3 <sup>2</sup> /   | 9,067   | 1  |
| 147-SNCAIP | 151.98 | 90,000-110,000  | 0  | 147-ATM/3 <sup>2</sup> /   | 3,449   | 13 |
| 148-SNCAIP | 151.98 | 120,000-140,000 | 5  | 148-MSH2/3 <sup>2</sup> /  | 36,626  | 30 |
| 149-SSH1   | 70.38  | 1-20,000        | 11 | 149-MSH2/3 <sup>2</sup> /  | 2,178   | 33 |
| 150-SSH1   | 70.38  | 30,000-50,000   | 17 | 150-MSH2/3 <sup>2</sup> /  | 15,380  | 42 |
| 151-SYT14  | 226.10 | 1-20,000        | 0  | 151-MSH2/3 <sup>2</sup> /  | 6,664   | 32 |
| 152-SYT14  | 226.10 | 30,000-50,000   | 3  | 152-MLH1/3 <sup>2</sup> /  | 6,053   | 4  |
| 153-SYT14  | 226.10 | 60,000-80,000   | 0  | 153-MLH1/3 <sup>2</sup> /  | 3,526   | 6  |
| 154-SYT14  | 226.10 | 90,000-110,000  | 0  | 154-MLH1/3 <sup>2</sup> /  | 14,331  | 17 |
| 155-SYT14  | 226.10 | 120,000-140,000 | 0  | 155-MLH1/3 <sup>2</sup> /  | 12,680  | 15 |
| 156-SYT14  | 226.10 | 150,000-170,000 | 5  | 156-MSH6/3 <sup>2</sup> /  | 11,311  | 30 |
| 157-SYT14  | 226.10 | 180,000-200,000 | 1  | 157-MSH6/3 <sup>2</sup> /  | 21,673  | 32 |
| 158-TBC1D1 | 248.08 | 1-20,000        | 8  | 158-PMS2/3 <sup>2</sup> /  | 1,158   | 58 |
| 159-TBC1D1 | 248.08 | 30,000-50,000   | 4  | 159-HEXA/3 <sup>2</sup> /  | 7,946   | 6  |
| 160-TBC1D1 | 248.08 | 60,000-80,000   | 5  | 160-HPRT1/3 <sup>2</sup> / | 13,280  | 10 |

|             |        |                 |    |                  |           |    |
|-------------|--------|-----------------|----|------------------|-----------|----|
| 161-TBC1D1  | 248.08 | 90,000-110,000  | 3  | 161-HPRT1/3'/    | 159       | 11 |
| 162-TBC1D1  | 248.08 | 120,000-140,000 | 2  | 162-LDLR/3'/     | 7,072     | 70 |
| 163-TBC1D1  | 248.08 | 150,000-170,000 | 6  | 163-PAX6/3'/     | 1,002,066 | 2  |
| 164-TBC1D1  | 248.08 | 180,000-200,000 | 0  | 164-PAX6/3'/     | 836,161   | 0  |
| 165-TBC1D1  | 248.08 | 210,000-230,000 | 2  | 165-IGHM/3'/     | 732,160   | 0  |
| 166-TDP1    | 88.86  | 1-20,000        | 0  | 166-PKLR/3'/     | 1,141     | 1  |
| 167-TDP1    | 88.86  | 30,000-50,000   | 2  | 167-LHCGR/3'/    | 6,085     | 3  |
| 168-TDP1    | 88.86  | 60,000-80,000   | 3  | 168-F 8/3'/      | 19,942    | 0  |
| 169-TMPO    | 33.33  | 1-20,000        | 31 | 169-F 8/3'/      | 29,175    | 2  |
| 170-TOP1MT  | 25.53  | 1-20,000        | 4  | 170-STS/3'/      | 40,058    | 1  |
| 171-UGT1A3  | 44.17  | 1-20,000        | 1  | 171-WAS/3'/      | 1,871     | 9  |
| 172-VCAN    | 110.63 | 1-20,000        | 0  | 172-VWF/3'/      | 61,045    | 6  |
| 173-VCAN    | 110.63 | 30,000-50,000   | 3  | 173-VWF/3'/      | 2,321     | 3  |
| 174-VCAN    | 110.63 | 60,000-80,000   | 0  | 174-VPS13B/3'/   | 1,783     | 12 |
| 175-VCAN    | 110.63 | 90,000-110,000  | 0  | 175-SMN1/3'/     | 6,693     | 38 |
| 176-WNT3    | 54.23  | 1-20,000        | 16 | 176-SLC3A1/3'/   | 30,317    | 8  |
| 177-WNT3    | 54.23  | 30,000-50,000   | 3  | 177-SERPING1/3'/ | 2,889     | 13 |
| 178-USP24   | 148.73 | 1-20,000        | 1  | 178-SDHC/3'/     | 8,370     | 17 |
| 179-USP24   | 148.73 | 30,000-50,000   | 1  | 179-SALL4/3'/    | 8,889     | 8  |
| 180-USP24   | 148.73 | 60,000-80,000   | 0  | 180-PROS1/3'/    | 4,434     | 9  |
| 181-USP24   | 148.73 | 90,000-110,000  | 1  | 181-PREPL/3'/    | 23,873    | 6  |
| 182-USP24   | 148.73 | 120,000-140,000 | 1  | 182-PREPL/3'/    | 38,121    | 6  |
| 183-XPNPEP2 | 30.58  | 1-20,000        | 3  | 183-PKHD1/3'/    | 7,319     | 2  |
| 184-XYLT1   | 368.56 | 1-20,000        | 1  | 184-PKHD1/3'/    | 13,203    | 2  |
| 185-XYLT1   | 368.56 | 30,000-50,000   | 6  | 185-PKD1/3'/     | 2,899     | 0  |
| 186-XYLT1   | 368.56 | 60,000-80,000   | 9  | 186-PINK1/3'/    | 4,603     | 13 |
| 187-XYLT1   | 368.56 | 90,000-110,000  | 0  | 187-PARK2/3'/    | 156,203   | 0  |

|           |        |                 |    |                              |         |    |
|-----------|--------|-----------------|----|------------------------------|---------|----|
| 188-XYLT1 | 368.56 | 120,000-140,000 | 12 | 188-OCA2/3 <sup>2</sup> /    | 122,571 | 0  |
| 189-XYLT1 | 368.56 | 150,000-170,000 | 6  | 189-NSD1/3 <sup>2</sup> /    | 23,881  | 64 |
| 190-XYLT1 | 368.56 | 180,000-200,000 | 6  | 190-NSD1/3 <sup>2</sup> /    | 7,997   | 12 |
| 191-XYLT1 | 368.56 | 210,000-230,000 | 1  | 191-MLC1/3 <sup>2</sup> /    | 2,152   | 14 |
| 192-XYLT1 | 368.56 | 240,000-260,000 | 7  | 192-ATP7A/3 <sup>2</sup> /   | 15,210  | 6  |
| 193-XYLT1 | 368.56 | 270,000-290,000 | 7  | 193-ATP7A/3 <sup>2</sup> /   | 13,734  | 8  |
| 194-XYLT1 | 368.56 | 300,000-320,000 | 3  | 194-ATP7A/3 <sup>2</sup> /   | 13,738  | 10 |
| 195-XYLT1 | 368.56 | 330,000-350,000 | 0  | 195-AVPR2/3 <sup>2</sup> /   | 21,514  | 2  |
| 196-WWC1  | 177.67 | 1-20,000        | 6  | 196-CFTR/3 <sup>2</sup> /    | 1,530   | 0  |
| 197-WWC1  | 177.67 | 30,000-50,000   | 7  | 197-CFTR/3 <sup>2</sup> /    | 21,081  | 6  |
| 198-WWC1  | 177.67 | 60,000-80,000   | 5  | 198-CHRNE/3 <sup>2</sup> /   | 1,289   | 36 |
| 199-WWC1  | 177.67 | 90,000-110,000  | 10 | 199-COL17A1/3 <sup>2</sup> / | 20,995  | 0  |
| 200-WWC1  | 177.67 | 120,000-140,000 | 6  | 200-CYBB/3 <sup>2</sup> /    | 25,327  | 2  |
| 201-WWC1  | 177.67 | 150,000-170,000 | 11 | 201-FANCA/3 <sup>2</sup> /   | 2,059   | 30 |
| 202-XIST  | 32.09  | 1-20,000        | 0  | 202-FANCA/3 <sup>2</sup> /   | 44,129  | 31 |
| 203-ZC3H3 | 103.80 | 1-20,000        | 4  | 203-FBN1/3 <sup>2</sup> /    | 6,435   | 0  |
| 204-ZC3H3 | 103.80 | 30,000-50,000   | 0  | 204-FBN1/3 <sup>2</sup> /    | 7,134   | 5  |
| 205-ZC3H3 | 103.80 | 60,000-80,000   | 0  | 205-FERMT1/3 <sup>2</sup> /  | 3,918   | 9  |
| 206-HMCN1 | 456.40 | 1-20,000        | 0  | 206-FGA/3 <sup>2</sup> /     | 15,229  | 4  |
| 207-HMCN1 | 456.40 | 30,000-50,000   | 0  | 207-FOXL2/3 <sup>2</sup> /   | 8,226   | 1  |
| 208-HMCN1 | 456.40 | 60,000-80,000   | 0  | 208-GAA/3 <sup>2</sup> /     | 8,287   | 6  |
| 209-HMCN1 | 456.40 | 90,000-110,000  | 1  | 209-GBE1/3 <sup>2</sup> /    | 105,686 | 1  |
| 210-HMCN1 | 456.40 | 120,000-140,000 | 1  | 210-GHR/3 <sup>2</sup> /     | 4,098   | 1  |
| 211-HMCN1 | 456.40 | 150,000-170,000 | 1  | 211-GLA/3 <sup>2</sup> /     | 4,518   | 22 |
| 212-HMCN1 | 456.40 | 180,000-200,000 | 0  | 212-GLA/3 <sup>2</sup> /     | 4,654   | 21 |
| 213-HMCN1 | 456.40 | 210,000-230,000 | 0  | 213-GLI3/3 <sup>2</sup> /    | 176,334 | 2  |
| 214-HMCN1 | 456.40 | 240,000-260,000 | 1  | 214-GLI3/3 <sup>2</sup> /    | 150,856 | 0  |

|           |        |                 |       |              |           |       |
|-----------|--------|-----------------|-------|--------------|-----------|-------|
| 215-HMCN1 | 456.40 | 270,000-290,000 | 12    | 215-GLI3/3'/ | 1,006,671 | 1     |
| 216-HMCN1 | 456.40 | 300,000-320,000 | 0     | 216-GLI3/3'/ | 727,747   | 2     |
| 217-HMCN1 | 456.40 | 330,000-350,000 | 0     | 217-GLI3/3'/ | 5,952,284 | 1     |
| 218-HMCN1 | 456.40 | 360,000-380,000 | 0     | 218-HBA1/3'/ | 11,172    | 9     |
| 219-HMCN1 | 456.40 | 390,000-410,000 | 0     | SUM          |           | 2,723 |
| 220-HMCN1 | 456.40 | 420,000-440,000 | 0     |              |           |       |
| SUM       |        |                 | 1,345 |              |           |       |

\*Total LIR numbers were determined in 220 control and 218 deletion sequences (for control and deletion groups, respectively) using IRF software. LIRs were detected within  $\pm 10$  kb flanking 5' and 3' breakpoint sequences of gene deletions. Control genes were randomly selected (outlined in Materials and Methods) and LIRs investigated within 20 kb segments of DNA sequence. Total LIR numbers were compared using Mann Whitney *U* test between control and deletion groups.

Abbreviations: Bp, base pair; IRF, inverted repeat finder; Kb, kilobase; LIR, long inverted repeat; Nr, number.

Table S3 | Properties of LIRs selected from genomic regions including 5' and 3' breakpoint locations\*

| GENE                 | 5' BREAKPOINT-LIRs |                 |                  |                  | 3' BREAKPOINT-LIRs |     |       |       | GENE             | 5' BREAKPOINT-LIRs |     |       |       | 3' BREAKPOINT-LIRs |     |       |       |
|----------------------|--------------------|-----------------|------------------|------------------|--------------------|-----|-------|-------|------------------|--------------------|-----|-------|-------|--------------------|-----|-------|-------|
|                      | IS <sup>a</sup>    | SL <sup>a</sup> | SID <sup>a</sup> | DIS <sup>a</sup> | IS                 | SL  | SID   | DIS   |                  | IS                 | SL  | SID   | DIS   | IS                 | SL  | SID   | DIS   |
| 1- <i>BRCA1</i>      | 1014               | 301             | 81.75            | Incl.            | 1549               | 306 | 82.37 | Incl. | 28- <i>WT1</i>   | -                  |     |       |       | 142                | 286 | 82.81 | 535   |
| 2- <i>BRCA1</i>      | 1106               | 118             | 82.35            | Incl.            | 1232               | 175 | 82.39 | Incl. | 29- <i>DMD</i>   | 16                 | 28  | 89.28 | 1897  | -                  |     |       |       |
| 3- <i>BRCA1</i>      | 3                  | 82              | 81.92            | 989              | 1465               | 282 | 77.97 | 271   | 30- <i>DMD</i>   | -                  |     |       |       | 10                 | 57  | 76.66 | 1260  |
| 4- <i>BRCA1</i>      | 555                | 180             | 84.61            | 944              | 513                | 171 | 81.50 | 1902  | 31- <i>PTEN</i>  | 768                | 310 | 71.65 | 1165  | 960                | 100 | 94.00 | Incl. |
| 5- <i>BRCA1</i>      | 174                | 292             | 79.05            | 362              | 460                | 603 | 75.48 | Incl. | 32- <i>PTEN</i>  | 50                 | 42  | 85.71 | 1385  | -                  |     |       |       |
| 6- <i>BRCA1</i>      | 454                | 299             | 84.38            | 632              | 449                | 295 | 79.59 | Incl. | 33- <i>PTEN</i>  | 83                 | 220 | 87.94 | Incl. | -                  |     |       |       |
| 7- <i>BRCA2</i>      | 1214               | 291             | 80.47            | 558              | 1630               | 251 | 86.82 | 1198  | 34- <i>PTEN</i>  | -                  |     |       |       | -                  |     |       |       |
| 8- <i>BRCA2</i>      | 1630               | 251             | 86.43            | Incl.            | -                  |     |       |       | 35- <i>MEN1</i>  | 1246               | 410 | 78.31 | Incl. | 95                 | 71  | 94.36 | 1715  |
| 9- <i>BRCA2</i>      | -                  |                 |                  |                  | 988                | 321 | 83.43 | 713   | 36- <i>BTK</i>   | 2                  | 54  | 78.18 | 904   | 1292               | 306 | 83.44 | 178   |
| 10- <i>BRCA2</i>     | 1144               | 275             | 83.15            | Incl.            | 488                | 328 | 81.32 | 1898  | 37- <i>HBB</i>   | 771                | 305 | 80.44 | 978   | -                  |     |       |       |
| 11- <i>BRCA2</i>     | 0                  | 30              | 87.09            | 869              | 1446               | 300 | 88.37 | Incl. | 38- <i>ATM</i>   | 1741               | 279 | 72.93 | Incl. | 207                | 291 | 75.07 | 222   |
| 12- <i>CDKN2A/2B</i> | -                  |                 |                  |                  | 580                | 315 | 80.06 | 642   | 39- <i>MSH2</i>  | 673                | 270 | 84.55 | 199   | 24                 | 38  | 86.84 | 459   |
|                      | -                  |                 |                  |                  | -                  |     |       |       | 40- <i>MSH2</i>  | 24                 | 296 | 84.28 | Incl. | 783                | 289 | 85.46 | 843   |
| 13- <i>NF1</i>       | -                  |                 |                  |                  | 402                | 236 | 82.71 | 285   | 41- <i>MSH2</i>  | 808                | 291 | 77.88 | Incl. | 49                 | 30  | 93.33 | 633   |
| 14- <i>NF1</i>       | 0                  | 50              | 98.00            | 361              | -                  |     |       |       | 42- <i>MSH2</i>  | 614                | 266 | 81.78 | 261   | 1248               | 269 | 72.69 | 1509  |
| 15- <i>RBI</i>       | -                  |                 |                  |                  | -                  |     |       |       | 43- <i>MLH1</i>  | 1454               | 276 | 76.97 | 950   | 5                  | 27  | 100.0 | 2121  |
| 16- <i>RBI</i>       | 480                | 255             | 87.25            | 1442             | -                  |     |       |       | 44- <i>MLH1</i>  | -                  |     |       |       | 2422               | 168 | 83.62 | 401   |
| 17- <i>RBI</i>       | 960                | 973             | 70.54            | 1946             | -                  |     |       |       | 45- <i>MLH1</i>  | 1692               | 295 | 88.88 | Incl. | 1134               | 298 | 86.37 | Incl. |
| 18- <i>RBI</i>       | -                  |                 |                  |                  | 515                | 139 | 75.17 | 996   | 46- <i>MLH1</i>  | 235                | 113 | 76.31 | 1678  | 374                | 310 | 82.70 | Incl. |
| 19- <i>RBI</i>       | 301                | 305             | 75.64            | 1876             | -                  |     |       |       | 47- <i>MSH6</i>  | 1360               | 286 | 86.45 | Incl. | 1339               | 293 | 80.20 | Incl. |
| 20- <i>RBI</i>       | 1166               | 279             | 79.28            | 235              | -                  |     |       |       | 48- <i>MSH6</i>  | 572                | 134 | 84.55 | Incl. | 935                | 299 | 80.92 | Incl. |
| 21- <i>APC</i>       | -                  |                 |                  |                  | 260                | 300 | 83.55 | 766   | 49- <i>PMS2</i>  | 1260               | 296 | 84.76 | Incl. | 750                | 327 | 77.97 | Incl. |
| 22- <i>APC</i>       | -                  |                 |                  |                  | -                  |     |       |       | 50- <i>HEXA</i>  | -                  |     |       |       | 1778               | 170 | 77.90 | Incl. |
| 23- <i>TSC2</i>      | 132                | 282             | 85.56            | 458              | -                  |     |       |       | 51- <i>HPRT1</i> | 0                  | 30  | 93.33 | 468   | 6                  | 30  | 86.66 | 2539  |
| 24- <i>TSC2</i>      | 1213               | 306             | 82.74            | Incl.            | -                  |     |       |       | 52- <i>HPRT1</i> | -                  |     |       |       | -                  |     |       |       |
| 25- <i>TSC2</i>      | 597                | 290             | 85.61            | 616              | 597                | 290 | 85.61 | 1532  | 53- <i>LDLR</i>  | 863                | 261 | 86.36 | Incl. | 1618               | 294 | 88.03 | Incl. |
| 26- <i>TSC1</i>      | -                  |                 |                  |                  | 657                | 300 | 85.01 | 2110  | 54- <i>PAX6</i>  | -                  |     |       |       | 917                | 288 | 79.36 | 1332  |
| 27- <i>ADA</i>       | 1092               | 109             | 85.71            | Incl.            | 1853               | 272 | 83.57 | Incl. | 55- <i>PAX6</i>  | -                  |     |       |       | -                  |     |       |       |

Table S3 Continued

| GENE               | 5' BREAKPOINT-LIRs |     |       |       | 3' BREAKPOINT-LIRs |     |       |       | GENE              | 5' BREAKPOINT-LIRs |     |       |       | 3' BREAKPOINT-LIRs |     |       |       |
|--------------------|--------------------|-----|-------|-------|--------------------|-----|-------|-------|-------------------|--------------------|-----|-------|-------|--------------------|-----|-------|-------|
|                    | IS                 | SL  | SID   | DIS   | IS                 | SL  | SID   | DIS   |                   | IS                 | SL  | SID   | DIS   | IS                 | SL  | SID   | DIS   |
| <i>56-IGHM</i>     | -                  |     |       |       | -                  |     |       |       | <i>83-ATP7A</i>   | -                  |     |       |       | 258                | 282 | 83.91 | Incl. |
| <i>57-PKLR</i>     | 2175               | 307 | 81.84 | 1395  | -                  |     |       |       | <i>84-ATP7A</i>   | 1544               | 232 | 84.32 | Incl. | 93                 | 75  | 79.22 | 1681  |
| <i>58-LHCGR</i>    | -                  |     |       |       | 1551               | 289 | 84.64 | Incl. | <i>85-ATP7A</i>   | 345                | 288 | 87.32 | 18    | 367                | 86  | 79.31 | 158   |
| <i>59-F 8</i>      | 7                  | 26  | 92.30 | 2296  | -                  |     |       |       | <i>86-AVPR2</i>   | 129                | 182 | 84.23 | 539   | -                  |     |       |       |
| <i>60-F 8</i>      | -                  |     |       |       | -                  |     |       |       | <i>87-CFTR</i>    | -                  |     |       |       | -                  |     |       |       |
| <i>61-STS</i>      | -                  |     |       |       | -                  |     |       |       | <i>88-CFTR</i>    | 884                | 316 | 87.46 | 1954  | 843                | 94  | 97.87 | 1332  |
| <i>62-WAS</i>      | 254                | 259 | 79.31 | 1733  | 15                 | 69  | 81.42 | 118   | <i>89-CHRNE</i>   | 432                | 629 | 75.03 | 474   | -                  |     |       |       |
| <i>63-VWF</i>      | 658                | 319 | 86.91 | Incl. | 1917               | 290 | 85.42 | 403   | <i>90-COL17A1</i> | -                  |     |       |       | -                  |     |       |       |
| <i>64-VWF</i>      | -                  |     |       |       | 1238               | 270 | 79.85 | 692   | <i>91-CYBB</i>    | -                  |     |       |       | -                  |     |       |       |
| <i>65-VPS13B</i>   | 106                | 280 | 85.71 | 403   | 318                | 294 | 83.38 | Incl. | <i>92-FANCA</i>   | 1324               | 280 | 80.00 | Incl. | 1073               | 286 | 80.00 | 2070  |
| <i>66-SMNI</i>     | 331                | 277 | 83.27 | Incl. | 34                 | 170 | 84.79 | Incl. | <i>93-FANCA</i>   | 971                | 291 | 81.29 | 50    | 1120               | 366 | 82.27 | Incl. |
| <i>67-SLC3A1</i>   | 555                | 128 | 82.03 | Incl. | 1801               | 50  | 84.61 | 1720  | <i>94-FBN1</i>    | -                  |     |       |       | -                  |     |       |       |
| <i>68-SERPING1</i> | 1874               | 37  | 84.61 | 1918  | 1447               | 141 | 85.10 | Incl. | <i>95-FBN1</i>    | -                  |     |       |       | 0                  | 28  | 96.42 | 611   |
| <i>69-SDHC</i>     | 2435               | 58  | 83.05 | 1148  | 1417               | 302 | 83.06 | 1906  | <i>96-FERMT1</i>  | 696                | 272 | 81.15 | 230   | 30                 | 48  | 81.63 | 89    |
| <i>70-SALLA</i>    | 370                | 313 | 80.49 | 2311  | -                  |     |       |       | <i>97-FGA</i>     | -                  |     |       |       | -                  |     |       |       |
| <i>71-PROS1</i>    | 1348               | 245 | 81.71 | Incl. | 222                | 303 | 73.33 | 2101  | <i>98-FOXL2</i>   | -                  |     |       |       | -                  |     |       |       |
| <i>72-PREPL</i>    | -                  |     |       |       | 124                | 109 | 75.22 | 1801  | <i>99-GAA</i>     | -                  |     |       |       | -                  |     |       |       |
| <i>73-PREPL</i>    | 419                | 276 | 79.56 | Incl. | 621                | 284 | 77.00 | 230   | <i>100-GBE1</i>   | -                  |     |       |       | 1                  | 37  | 87.17 | 794   |
| <i>74-PKHD1</i>    | -                  |     |       |       | -                  |     |       |       | <i>101-GHR</i>    | -                  |     |       |       | -                  |     |       |       |
| <i>75-PKHD1</i>    | -                  |     |       |       | 52                 | 63  | 80.30 | 1680  | <i>102-GLA</i>    | 1281               | 282 | 84.02 | 1206  | 1558               | 276 | 84.22 | Incl. |
| <i>76-PKD1</i>     | -                  |     |       |       | -                  |     |       |       | <i>103-GLA</i>    | 790                | 279 | 80.85 | 1959  | 104                | 297 | 85.00 | Incl. |
| <i>77-PINK1</i>    | 416                | 262 | 83.77 | Incl. | 1736               | 292 | 82.65 | 1785  | <i>104-GLI3</i>   | 141                | 291 | 80.87 | 752   | -                  |     |       |       |
| <i>78-PARK2</i>    | 722                | 275 | 80.63 | 1038  | -                  |     |       |       | <i>105-GLI3</i>   | -                  |     |       |       | -                  |     |       |       |
| <i>79-OCA2</i>     | 2102               | 527 | 74.02 | 663   | -                  |     |       |       | <i>106-GLI3</i>   | -                  |     |       |       | -                  |     |       |       |
| <i>80-NSD1</i>     | 1592               | 199 | 82.26 | 577   | 24                 | 276 | 81.33 | 779   | <i>107-GLI3</i>   | 277                | 24  | 100.0 | 1079  | -                  |     |       |       |
| <i>81-NSD1</i>     | 690                | 136 | 83.33 | 1847  | 1067               | 301 | 86.09 | Incl. | <i>108-GLI3</i>   | -                  |     |       |       | 2410               | 256 | 78.37 | 1139  |
| <i>82-MLC1</i>     | 1670               | 104 | 81.13 | Incl. | 707                | 299 | 84.10 | Incl. | <i>109-HBA1</i>   | 725                | 296 | 84.94 | Incl. | 106                | 32  | 87.87 | 1729  |

\*LIRs from genomic regions including 5' and 3' breakpoints of gross gene deletions were selected. Abbreviations: <sup>a</sup> DIS, distance from breakpoint (base pair, bp); Incl., including breakpoint; IS, internal spacer (bp); SID, stem identity (%); SL, stem length (bp).

Table S4 | Properties of new LIRs identified between distant genomic regions including 5' and 3' breakpoint sequences\*

| No <sup>#</sup> | GENE             | 5'LIR/3'LIR <sup>a</sup> | LIRs                               |                  |                  | No <sup>#</sup> | GENE         | 5'LIR/3'LIR | LIRs                               |       |      |
|-----------------|------------------|--------------------------|------------------------------------|------------------|------------------|-----------------|--------------|-------------|------------------------------------|-------|------|
|                 |                  |                          | Between 5' and 3' BPS <sup>a</sup> |                  |                  |                 |              |             | Between 5' and 3' BPS <sup>a</sup> |       |      |
|                 |                  |                          | SL <sup>a</sup>                    | SID <sup>a</sup> | DIS <sup>a</sup> |                 |              |             | SL                                 | SID   | DIS  |
| 8               | <i>BRCA2</i>     | +/-                      | 240                                | 82.30            | 748              | 44              | <i>MLH1</i>  | -/+         | 288                                | 83.90 | 3285 |
| 9               | <i>BRCA2</i>     | -/+                      | -                                  |                  |                  | 50              | <i>HEXA</i>  | -/+         | 292                                | 81.31 | 3935 |
| 12              | <i>CDKN2A/2B</i> | -/+                      | 298                                | 73.28            | 4513             | 54              | <i>PAX6</i>  | -/+         | 298                                | 83.55 | 4062 |
| 13              | <i>NF1</i>       | -/+                      | -                                  |                  |                  | 57              | <i>PKLR</i>  | +/-         | -                                  |       |      |
| 14              | <i>NF1</i>       | +/-                      | 301                                | 75.22            | 574              | 58              | <i>LHCGR</i> | -/+         | 279                                | 77.85 | 1747 |
| 16              | <i>RBI</i>       | +/-                      | 249                                | 84.06            | 2956             | 59              | <i>F 8</i>   | +/-         | -                                  |       |      |
| 17              | <i>RBI</i>       | +/-                      | -                                  |                  |                  | 64              | <i>VWF</i>   | -/+         | 299                                | 79.08 | 3855 |
| 18              | <i>RBI</i>       | -/+                      | 293                                | 82.09            | 1217             | 70              | <i>SALL4</i> | +/-         | 296                                | 80.65 | 3829 |
| 19              | <i>RBI</i>       | +/-                      | 300                                | 82.23            | 9330             | 72              | <i>PREPL</i> | -/+         | 302                                | 79.93 | 3440 |
| 20              | <i>RBI</i>       | +/-                      | -                                  |                  |                  | 75              | <i>PKHD1</i> | -/+         | -                                  |       |      |
| 21              | <i>APC</i>       | -/+                      | -                                  |                  |                  | 78              | <i>PARK2</i> | +/-         | -                                  |       |      |
| 23              | <i>TSC2</i>      | +/-                      | 305                                | 79.28            | 382              | 79              | <i>OCA2</i>  | +/-         | 1789                               | 70.19 | 971  |
| 24              | <i>TSC2</i>      | +/-                      | 316                                | 81.34            | 42               | 83              | <i>ATP7A</i> | -/+         | 296                                | 86.66 | 1333 |
| 26              | <i>TSC1</i>      | -/+                      | 302                                | 75.49            | 5852             | 86              | <i>AVPR2</i> | +/-         | -                                  |       |      |
| 28              | <i>WT1</i>       | -/+                      | 282                                | 83.15            | 3167             | 89              | <i>CHRNE</i> | +/-         | 292                                | 83.21 | 1380 |
| 29              | <i>DMD</i>       | +/-                      | -                                  |                  |                  | 95              | <i>FBN1</i>  | -/+         | -                                  |       |      |
| 30              | <i>DMD</i>       | -/+                      | 195                                | 82.65            | 2998             | 100             | <i>GBE1</i>  | -/+         | -                                  |       |      |
| 32              | <i>PTEN</i>      | +/-                      | -                                  |                  |                  | 104             | <i>GLI3</i>  | +/-         | -                                  |       |      |
| 33              | <i>PTEN</i>      | +/-                      | 296                                | 81.22            | 1581             | 107             | <i>GLI3</i>  | +/-         | 285                                | 78.23 | 4550 |
| 37              | <i>HBB</i>       | +/-                      | 173                                | 83.05            | 3388             | 108             | <i>GLI3</i>  | -/+         | -                                  |       |      |

\*40 gross gene deletions containing LIRs in only one of genomic sequences flanking 5' and 3' breakpoints, were obtained from Table S3 and re-examined in terms of the capacity to form new LIRs. Before LIRs were identified using IRF, 5 kb of DNA sequence from breakpoints containing a LIR and 10 kb of DNA sequence from breakpoints containing no LIR were combined. Internal spacers between 5 kb and 10 kb segments were excluded. In total, 24 LIRs were detected. <sup>#</sup>Numbers of genes are as in Table S3. Abbreviations: <sup>a</sup> BPS, breakpoint sequences; DIS, distance from breakpoint with no LIR (bp); LIR, long inverted repeat; SID, stem identity (%); SL, stem length (bp).



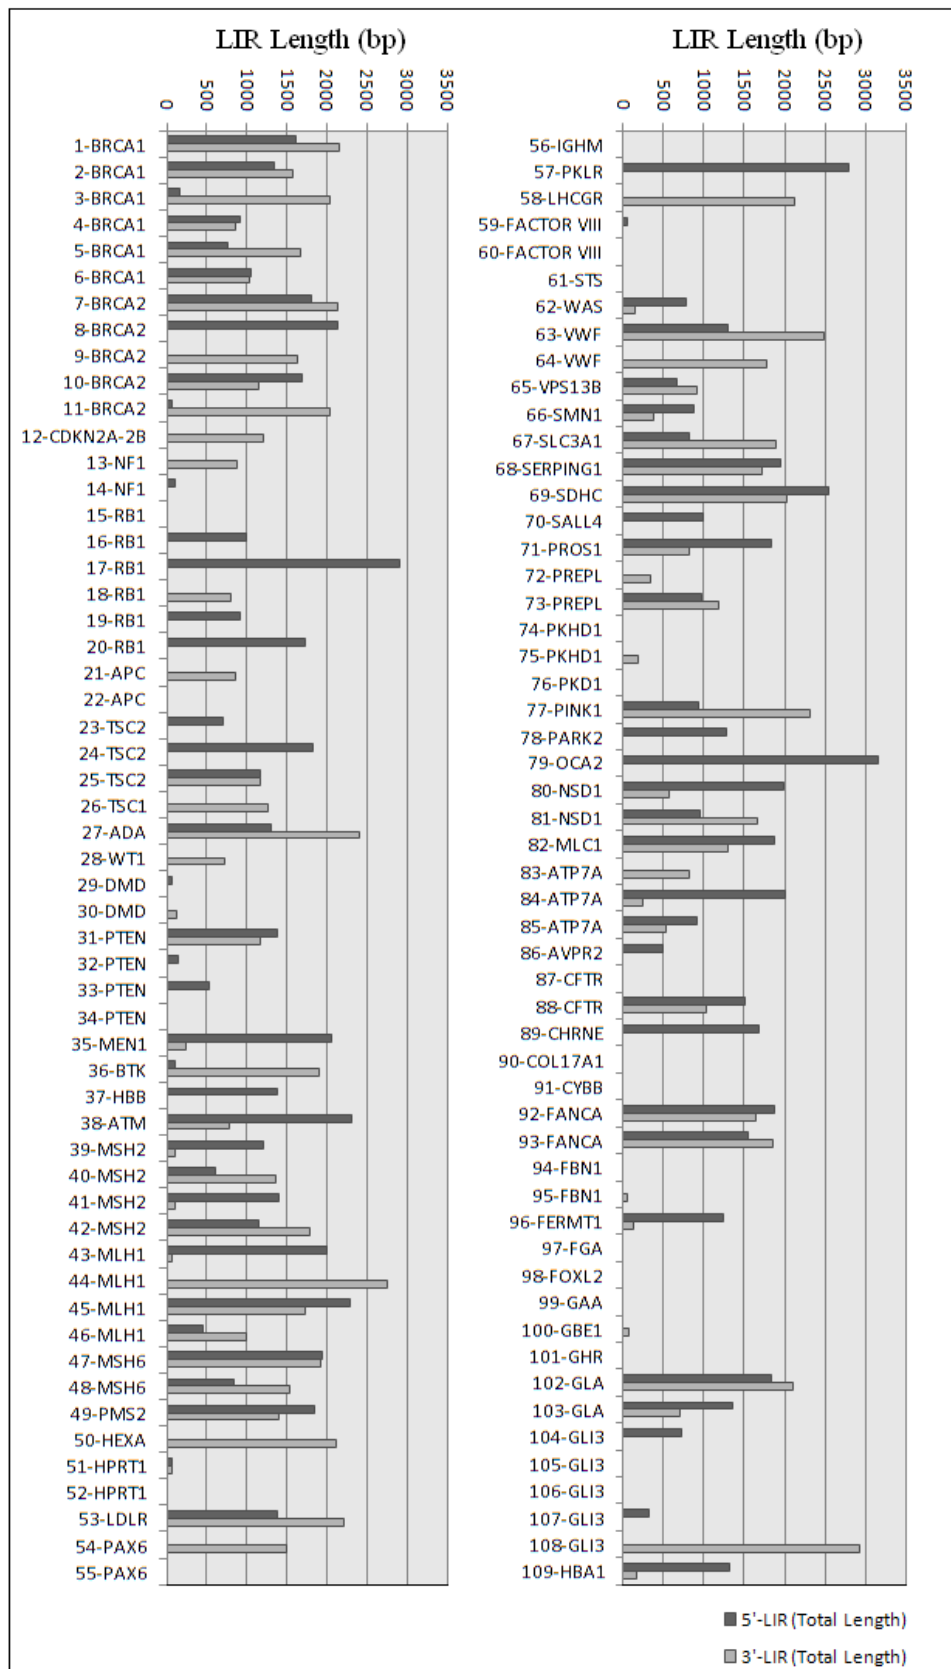

**Figure S1 | Distribution of 138 LIRs in the 5' and 3' breakpoint regions from 109 gross gene deletions.** Total lengths of each LIR were examined. Total length includes the sum of lengths (bp) of loop and stem copies. Black bars indicate LIRs located at 5' breakpoints, and grey bars LIRs at 3' breakpoints. Abbreviations: bp, base pair; LIR, long inverted repeat.

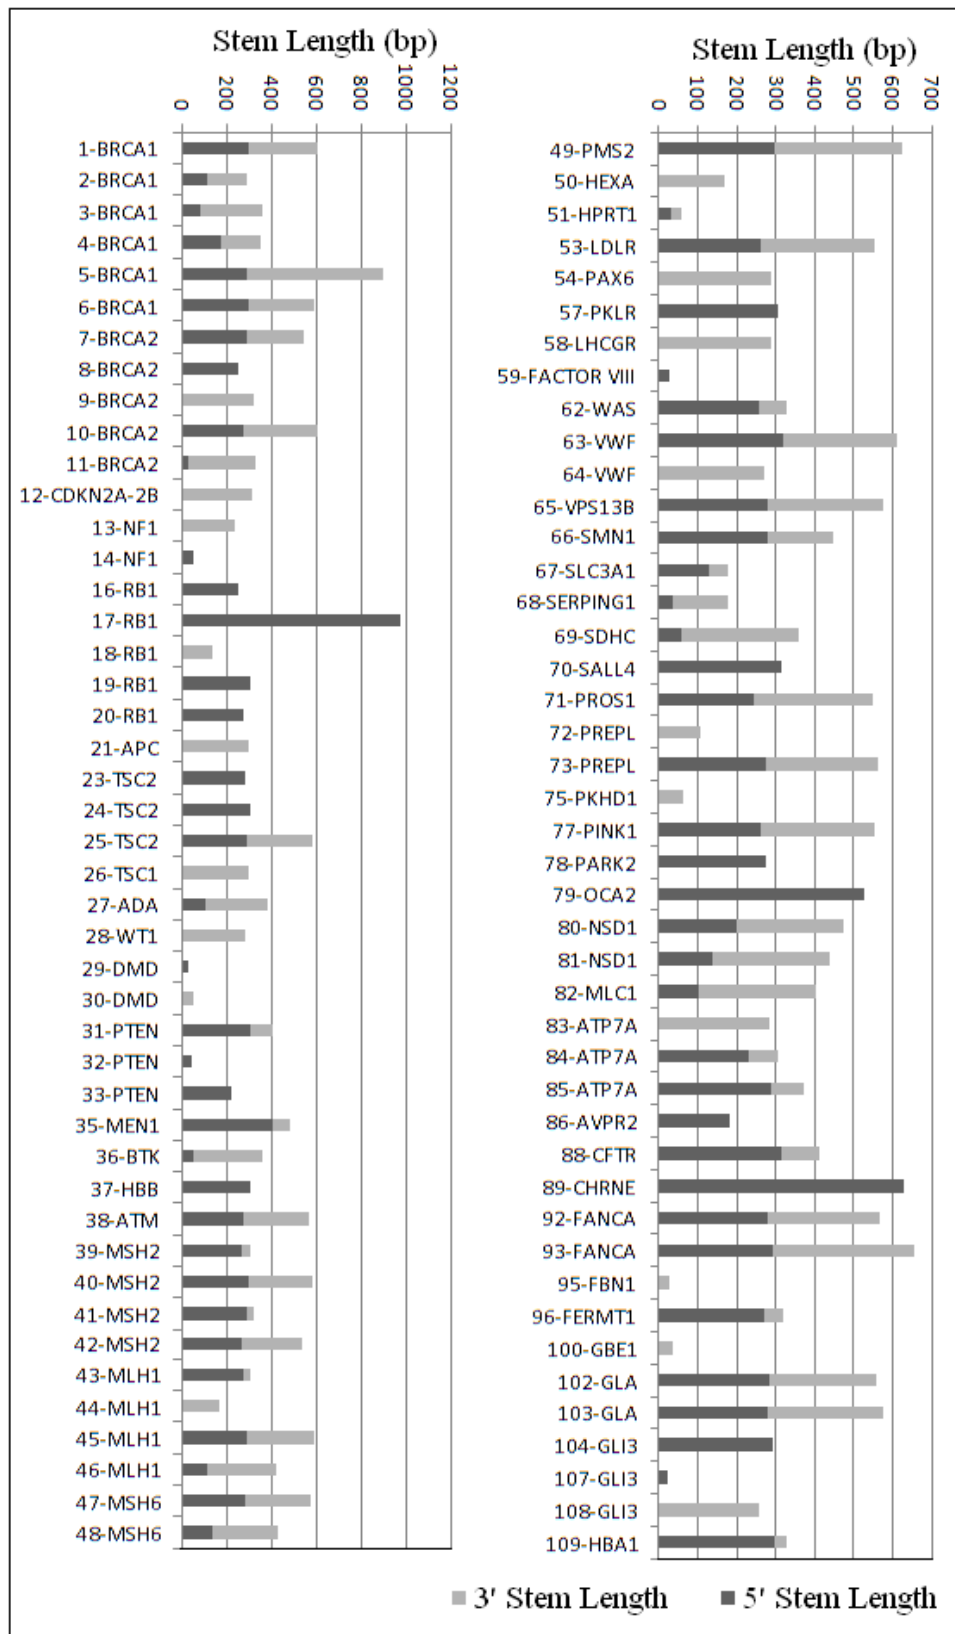

**Figure S2 | Stem lengths of 138 LIRs identified in 5'and/or 3' breakpoints from 89 gross deletions.** Black and grey bars indicate stem lengths of LIRs located at 5' and 3' breakpoints, respectively. Abbreviations: bp, base pair; LIR, long inverted repeat.

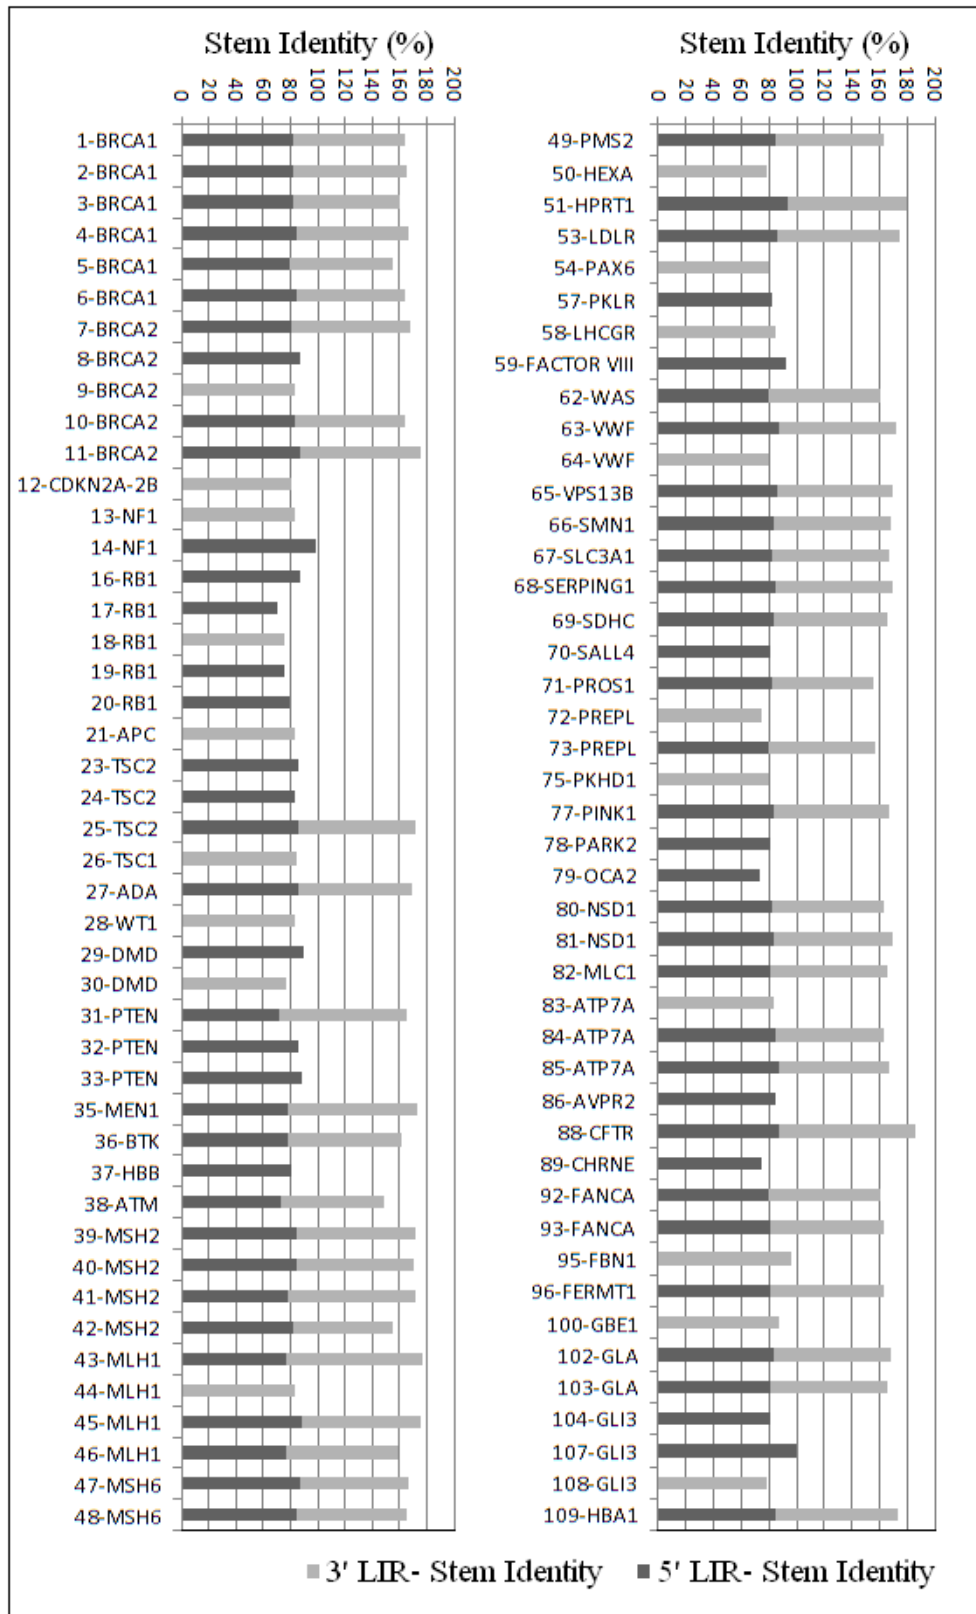

**Figure S3 | Stem identities of 138 LIRs identified in 5' and/or 3' breakpoints from 89 gross deletions.** Black and grey bars indicate stem identities of LIRs located at 5' and 3' breakpoints, respectively. Abbreviations: LIR, long inverted repeat.

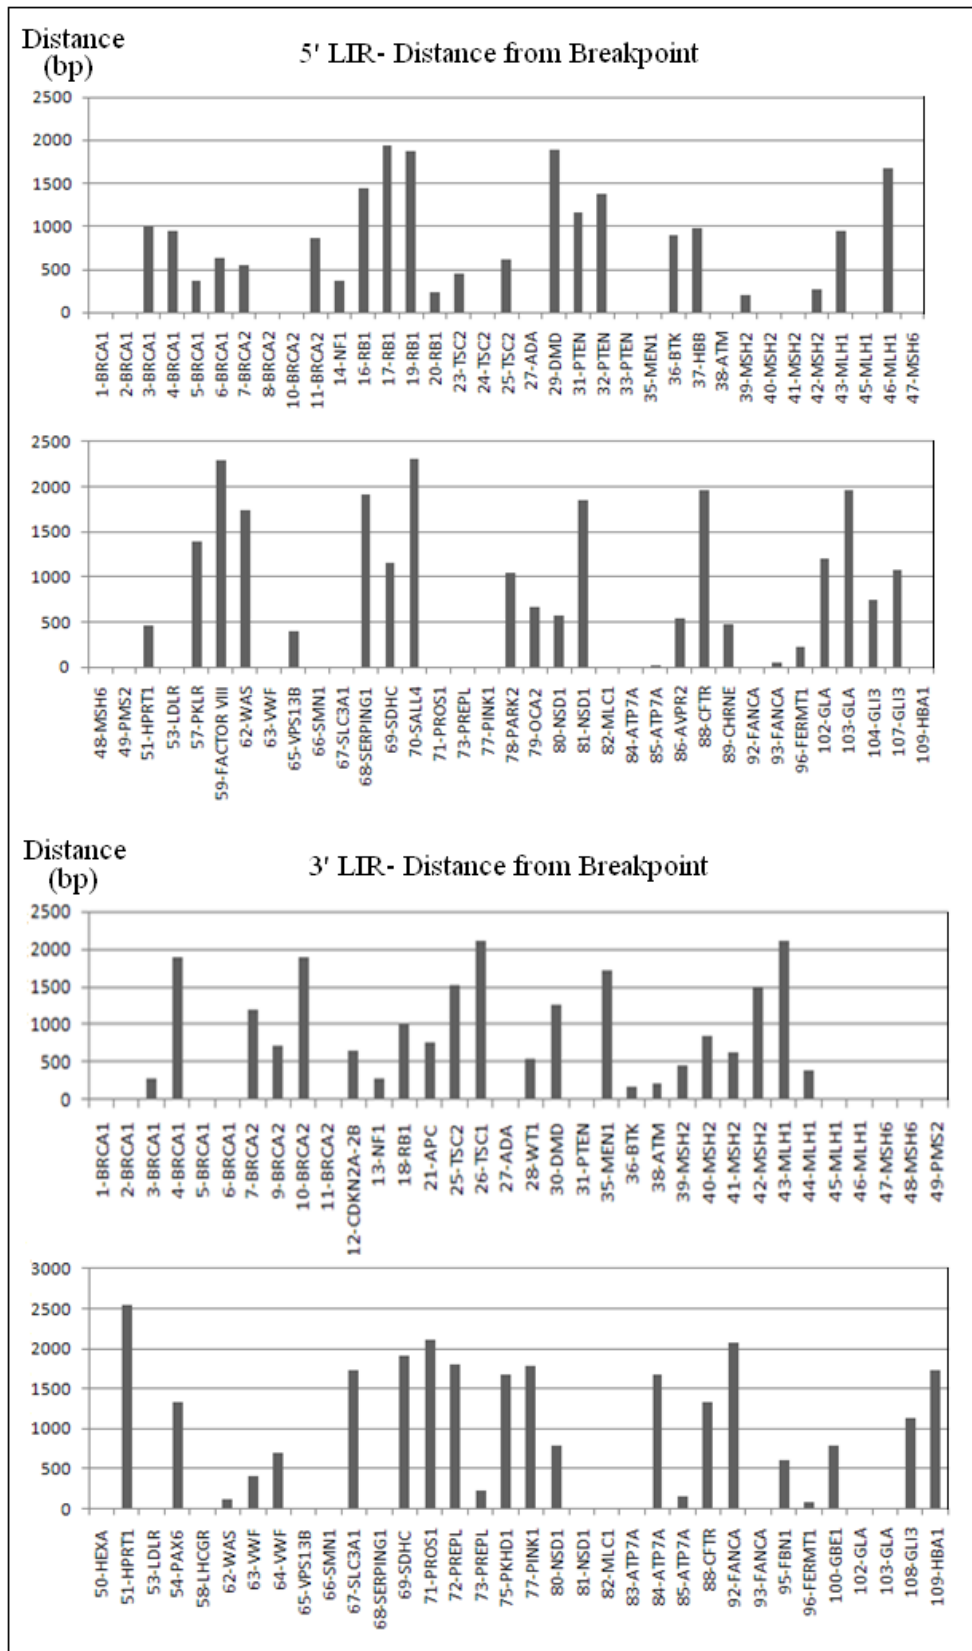

**Figure S4 | Distance from breakpoint of the 138 LIRs located at the 5' and 3' breakpoints of gross gene deletions.** 70 LIRs were located at  $\pm 0$ –2,311 bp of 5' breakpoint sequences. 68 LIRs were located at  $\pm 0$ –2,539 bp of 3' breakpoint sequences. Abbreviations: bp, base pair; LIR, long inverted repeat.

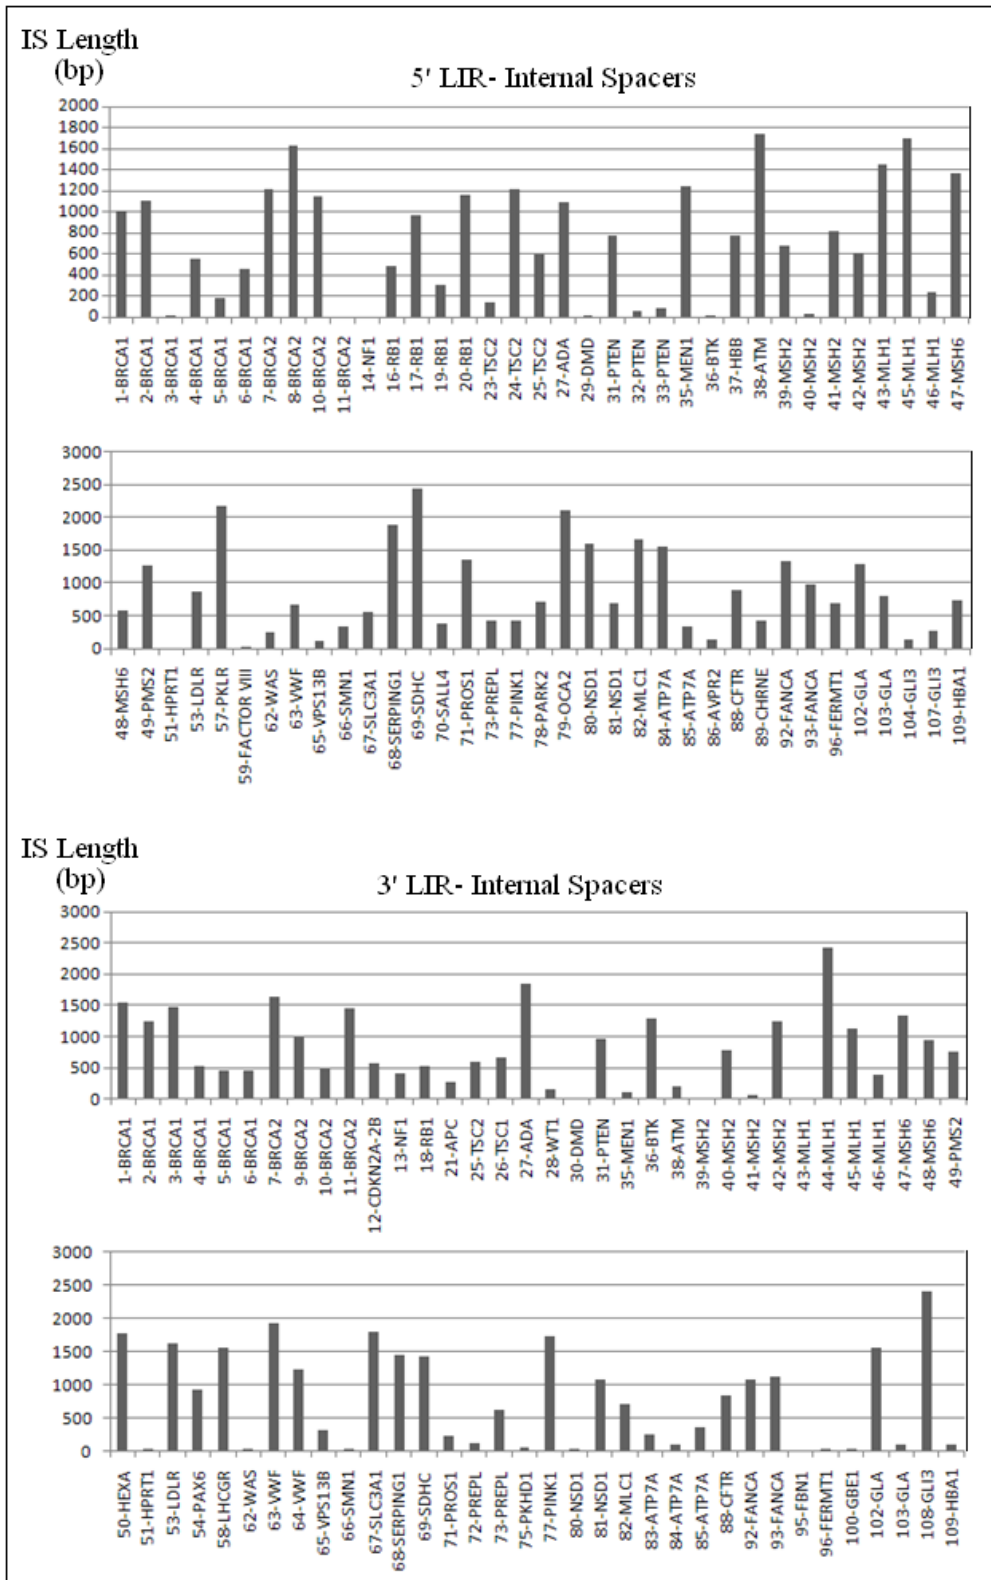

**Figure S5 | Internal spacer of the 138 LIRs located at the 5' and 3' breakpoints of gross gene deletions.** 70 ISs were between 0 and 2,435 bp in 5' breakpoints. 68 ISs were between 0 and 2,422 bp in 3' breakpoints. Abbreviations: bp, base pair; IS, internal spacer; LIR, long inverted repeat.

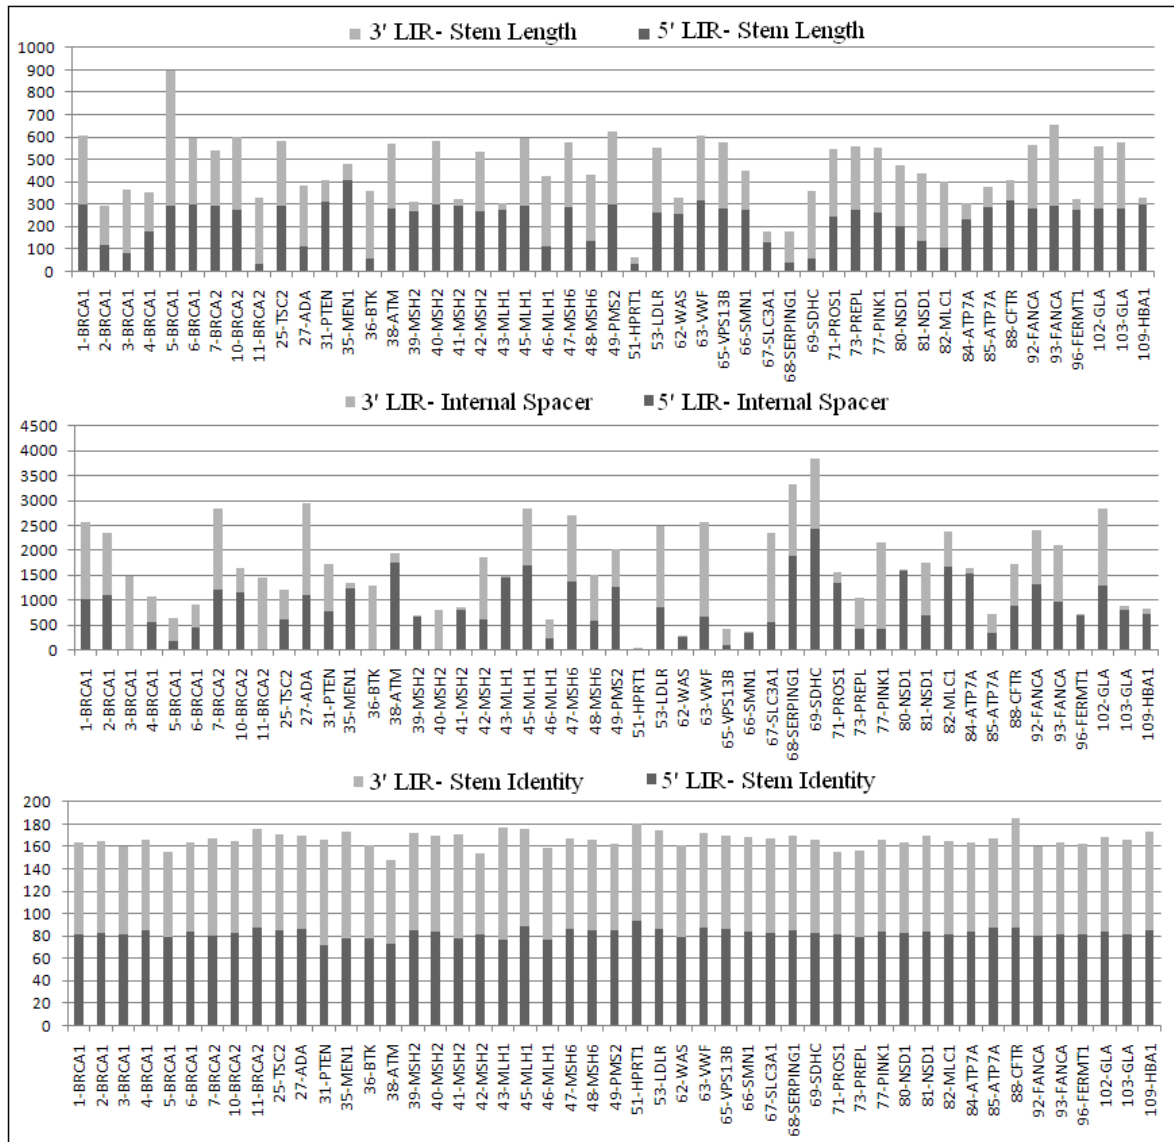

**Figure S6 | Properties of LIRs that included at both 5' and 3' breakpoint sequences from 49 genomic regions.** Total of 98 LIRs detected in both 5' and 3' breakpoints from 49 gross gene deletions. Black and grey bars show stem lengths, internal spacers and stem identities of LIRs located at 5' and 3' breakpoints, respectively. Abbreviations: LIR, long inverted repeat.
